# Supplementary material for: A Pork Industry in the Backyard: An Analysis of Toxoplasma gondii Infection in Serbia’s Pigs
Source: MDPI journal article supplement (doi:10.3390/microorganisms11071857), 2023-07-23
Supplement: s1 [file s1]

## A Pork Industry in the Backyard: An Analysis of *Toxoplasma gondii* Infection in Serbia's Pigs

Aleksandra Uzelac <sup>1,†</sup>, Nikola Betić <sup>2,†</sup>, Nedjeljko Karabasil <sup>3</sup>, Vladimir Ćirković <sup>1</sup>, Olgica Djurković-Djaković <sup>1</sup> and Ivana Klun <sup>1,\*</sup>

<sup>1</sup> Centre of Excellence for Food- and Vector-borne Zoonoses, Institute for Medical Research, University of Belgrade, 11129 Belgrade, Serbia

<sup>2</sup> Institute of Meat Hygiene and Technology, 11000 Belgrade, Serbia

<sup>3</sup> Department of Food Hygiene and Technology, Faculty of Veterinary Medicine, University of Belgrade, 11000, Belgrade, Serbia

\* Correspondence: iklun@imi.bg.ac.rs; Tel.: +381-11-2685-788

**Table S2.** Pig (n of heads) and pork (in tons) statistics from 2006 to 2021 in Serbia. The number of animals in the national herd is in bold type. Source: Statistical Office of the Republic of Serbia. Statistics of Agriculture, forestry and fishery [13].

| Year | Starting to-<br>tal | Production | Mortality | Import  | Export | Slaughter at<br>abattoirs | Total<br>slaughtered | Year-end<br>total | Pork pro-<br>duced <sup>1</sup> |
|------|---------------------|------------|-----------|---------|--------|---------------------------|----------------------|-------------------|---------------------------------|
| 2006 | <b>3,759,000</b>    | 7,360,000  | 852,000   | 0       | 1,000  | 1,052,765                 | 6,267,000            | <b>3,211,597</b>  | 255,000                         |
| 2007 | <b>4,000,000</b>    | 7,195,000  | 805,000   | 3,000   | 8,000  | 1,161,255                 | 6,553,000            | <b>3,831,894</b>  | 289,000                         |
| 2008 | <b>3,832,000</b>    | 6,081,000  | 612,000   | 3,000   | 21,000 | 970,267                   | 5,690,000            | <b>3,594,236</b>  | 266,000                         |
| 2009 | <b>3,594,000</b>    | 5,968,000  | 593,000   | 71,000  | 25,000 | 1,642,735                 | 5,385,000            | <b>3,631,013</b>  | 252,000                         |
| 2010 | <b>3,631,000</b>    | 6,237,000  | 619,000   | 10,000  | 42,000 | 1,791,091                 | 5,728,000            | <b>3,488,738</b>  | 269,000                         |
| 2011 | <b>3,489,000</b>    | 6,162,000  | 556,000   | 23,000  | 36,000 | 2,807,225                 | 5,795,000            | <b>3,286,900</b>  | 271,000                         |
| 2012 | <b>3,287,000</b>    | 5,805,000  | 524,000   | 55,000  | 32,000 | 1,714,006                 | 5,453,000            | <b>3,138,508</b>  | 258,000                         |
| 2013 | <b>3,139,000</b>    | 5,822,000  | 219,000   | 118,000 | 31,000 | 1,782,565                 | 5,684,000            | <b>3,144,207</b>  | 249,000                         |
| 2014 | <b>3,144,000</b>    | 5,668,000  | 223,000   | 330,000 | 26,000 | 2,031,428                 | 5,657,000            | <b>3,235,658</b>  | 258,000                         |
| 2015 | <b>3,236,000</b>    | 5,763,000  | 232,000   | 217,000 | 46,000 | 2,217,744                 | 5,654,000            | <b>3,284,378</b>  | 278,000                         |
| 2016 | <b>3,284,000</b>    | 5,824,000  | 283,000   | 77,000  | 28,000 | 2,211,838                 | 5,853,000            | <b>3,021,167</b>  | 301,000                         |
| 2017 | <b>3,027,000</b>    | 5,725,000  | 229,000   | 123,000 | 23,000 | 2,079,059                 | 5,706,000            | <b>2,910,525</b>  | 307,000                         |
| 2018 | <b>2,911,000</b>    | 5,611,000  | 224,000   | 252,000 | 22,000 | 2,079,059                 | 5,745,000            | <b>2,910,525</b>  | 303,000                         |
| 2019 | <b>2,782,000</b>    | 5,733,000  | 218,000   | 160,000 | 16,000 | 2,218,968                 | 5,538,000            | <b>2,903,007</b>  | 298,000                         |
| 2020 | <b>2,903,000</b>    | 5,670,000  | 251,000   | 163,000 | na     | 2,176,449                 | 5,502,000            | <b>2,983,102</b>  | 299,000                         |
| 2021 | <b>2,983,000</b>    | 5,415,000  | 240,000   | 246,000 | na     | 2,189,719                 | 5,536,000            | <b>2,868,121</b>  | 307,000                         |

<sup>1</sup> Tons
