# Supplementary material for: A Pork Industry in the Backyard: An Analysis of Toxoplasma gondii Infection in Serbia’s Pigs
Source: Microorganisms. 2023 Jul 23;11(7):1857. doi: 10.3390/microorganisms11071857 (PMC10385063; doi:10.3390/microorganisms11071857)
Supplement: Supplementary file 1 [file microorganisms-11-01857-s001.zip › Table S1.xlsx]

## Sheet: Worksheet
Supplementary material - Table S1
A Pork Industry in the Backyard: An Analysis of Toxoplasma gondii Infection in Serbia’s Pigs
Aleksandra Uzelac 1, Nikola Betić 2, Nedjeljko Karabasil 3, Vladimir Ćirković 1, Olgica Djurković-Djaković 1 and Ivana Klun 1,*
1 Centre of Excellence for Food- and Vector-borne Zoonoses, Institute for Medical Research, University of Belgrade, 11129 Belgrade, Serbia
2 Institute of Meat Hygiene and Technology, 11000 Belgrade, Serbia
3 Department of Food Hygiene and Technology, Faculty of Veterinary Medicine, University of Belgrade, 11000, Belgrade, Serbia
* Correspondence: iklun@imi.bg.ac.rs; Tel.: +381-11-2685-788
Table S1: Worldwide pig meat consumption 2014-2018 (Pork Meat Consumption Per Capita). Source: OECD Agriculture Statistics [8]
Yearly Data	Units	1961	1962	1963	1964	1965	1966	1967	1968	1969	1970	1971	1972	1973	1974	1975	1976	1977	1978	1979	1980	1981	1982	1983	1984	1985	1986	1987	1988	1989	1990	1991	1992	1993	1994	1995	1996	1997	1998	1999	2000	2001	2002	2003	2004	2005	2006	2007	2008
World	kg	locked	locked	locked	locked	locked	locked	locked	locked	locked	locked	locked	locked	locked	locked	locked	locked	locked	locked	locked	locked	locked	locked	locked	locked	locked	locked	locked	locked	locked	locked	locked	locked	locked	locked	locked	locked	locked	locked	locked	locked	locked	locked	locked	locked	locked	locked	locked	locked
Afghanistan	kg	...	...	...	...	...	...	...	...	...	...	...	...	...	...	...	...	...	...	...	...	...	...	...	...	...	...	...	...	...	...	...	...	...	...	...	...	...	...	...	...	...	...	...	...	...	...	...	...
Albania	kg	locked	locked	locked	locked	locked	locked	locked	locked	locked	locked	locked	locked	locked	locked	locked	locked	locked	locked	locked	locked	locked	locked	locked	locked	locked	locked	locked	locked	locked	locked	locked	locked	locked	locked	locked	locked	locked	locked	locked	locked	locked	locked	locked	locked	locked	locked	locked	locked
Algeria	kg	locked	locked	locked	locked	locked	locked	locked	locked	locked	locked	locked	locked	...	...	...	...	locked	...	...	...	locked	locked	...	locked	...	...	...	...	...	...	locked	...	...	...	locked	locked	...	locked	...	...	locked	locked	locked	locked	locked	locked	locked	locked
Angola	kg	locked	locked	locked	locked	locked	locked	locked	locked	locked	locked	locked	locked	locked	locked	locked	locked	locked	locked	locked	locked	locked	locked	locked	locked	locked	locked	locked	locked	locked	locked	locked	locked	locked	locked	locked	locked	locked	locked	locked	locked	locked	locked	locked	locked	locked	locked	locked	locked
Argentina	kg	locked	locked	locked	locked	locked	locked	locked	locked	locked	locked	locked	locked	locked	locked	locked	locked	locked	locked	locked	locked	locked	locked	locked	locked	locked	locked	locked	locked	locked	locked	locked	locked	locked	locked	locked	locked	locked	locked	locked	locked	locked	locked	locked	locked	locked	locked	locked	locked
Armenia	kg	...	...	...	...	...	...	...	...	...	...	...	...	...	...	...	...	...	...	...	...	...	...	...	...	...	...	...	...	...	...	...	locked	locked	locked	locked	locked	locked	locked	locked	locked	locked	locked	locked	locked	locked	locked	locked	locked
Australia	kg	locked	locked	locked	locked	locked	locked	locked	locked	locked	locked	locked	locked	locked	locked	locked	locked	locked	locked	locked	locked	locked	locked	locked	locked	locked	locked	locked	locked	locked	locked	locked	locked	locked	locked	locked	locked	locked	locked	locked	locked	locked	locked	locked	locked	locked	locked	locked	locked
Austria	kg	locked	locked	locked	locked	locked	locked	locked	locked	locked	locked	locked	locked	locked	locked	locked	locked	locked	locked	locked	locked	locked	locked	locked	locked	locked	locked	locked	locked	locked	locked	locked	locked	locked	locked	locked	locked	locked	locked	locked	locked	locked	locked	locked	locked	locked	locked	locked	locked
Azerbaijan	kg	...	...	...	...	...	...	...	...	...	...	...	...	...	...	...	...	...	...	...	...	...	...	...	...	...	...	...	...	...	...	...	locked	locked	locked	locked	locked	locked	locked	locked	locked	locked	locked	locked	locked	locked	locked	locked	locked
Bahamas	kg	locked	locked	locked	locked	locked	locked	locked	locked	locked	locked	locked	locked	locked	locked	locked	locked	locked	locked	locked	locked	locked	locked	locked	locked	locked	locked	locked	locked	locked	locked	locked	locked	locked	locked	locked	locked	locked	locked	locked	locked	locked	locked	locked	locked	locked	locked	locked	locked
Belarus	kg	...	...	...	...	...	...	...	...	...	...	...	...	...	...	...	...	...	...	...	...	...	...	...	...	...	...	...	...	...	...	...	locked	locked	locked	locked	locked	locked	locked	locked	locked	locked	locked	locked	locked	locked	locked	locked	locked
Belgium	kg	...	...	...	...	...	...	...	...	...	...	...	...	...	...	...	...	...	...	...	...	...	...	...	...	...	...	...	...	...	...	...	...	...	...	...	...	...	...	...	locked	locked	locked	locked	locked	locked	locked	locked	locked
Belize	kg	locked	locked	locked	locked	locked	locked	locked	locked	locked	locked	locked	locked	locked	locked	locked	locked	locked	locked	locked	locked	locked	locked	locked	locked	locked	locked	locked	locked	locked	locked	locked	locked	locked	locked	locked	locked	locked	locked	locked	locked	locked	locked	locked	locked	locked	locked	locked	locked
Benin	kg	locked	locked	locked	locked	locked	locked	locked	locked	locked	locked	locked	locked	locked	locked	locked	locked	locked	locked	locked	locked	locked	locked	locked	locked	locked	locked	locked	locked	locked	locked	locked	locked	locked	locked	locked	locked	locked	locked	locked	locked	locked	locked	locked	locked	locked	locked	locked	locked
Bolivia	kg	locked	locked	locked	locked	locked	locked	locked	locked	locked	locked	locked	locked	locked	locked	locked	locked	locked	locked	locked	locked	locked	locked	locked	locked	locked	locked	locked	locked	locked	locked	locked	locked	locked	locked	locked	locked	locked	locked	locked	locked	locked	locked	locked	locked	locked	locked	locked	locked
Bosnia and Herzegovina	kg	...	...	...	...	...	...	...	...	...	...	...	...	...	...	...	...	...	...	...	...	...	...	...	...	...	...	...	...	...	...	...	locked	locked	locked	locked	locked	locked	locked	locked	locked	locked	locked	locked	locked	locked	locked	locked	locked
Botswana	kg	locked	locked	locked	locked	locked	locked	locked	locked	locked	locked	locked	locked	locked	locked	locked	locked	locked	locked	locked	locked	locked	locked	locked	locked	locked	locked	locked	locked	locked	locked	locked	locked	locked	locked	locked	locked	locked	locked	locked	locked	locked	locked	locked	locked	locked	locked	locked	locked
Brazil	kg	locked	locked	locked	locked	locked	locked	locked	locked	locked	locked	locked	locked	locked	locked	locked	locked	locked	locked	locked	locked	locked	locked	locked	locked	locked	locked	locked	locked	locked	locked	locked	locked	locked	locked	locked	locked	locked	locked	locked	locked	locked	locked	locked	locked	locked	locked	locked	locked
Brunei	kg	locked	locked	locked	locked	locked	locked	locked	locked	locked	locked	locked	locked	locked	locked	locked	locked	locked	locked	locked	locked	locked	locked	locked	locked	locked	locked	locked	locked	locked	locked	locked	locked	locked	locked	locked	locked	locked	locked	locked	locked	locked	locked	locked	locked	locked	locked	locked	locked
Bulgaria	kg	locked	locked	locked	locked	locked	locked	locked	locked	locked	locked	locked	locked	locked	locked	locked	locked	locked	locked	locked	locked	locked	locked	locked	locked	locked	locked	locked	locked	locked	locked	locked	locked	locked	locked	locked	locked	locked	locked	locked	locked	locked	locked	locked	locked	locked	locked	locked	locked
Burkina Faso	kg	locked	locked	locked	locked	locked	locked	locked	locked	locked	locked	locked	locked	locked	locked	locked	locked	locked	locked	locked	locked	locked	locked	locked	locked	locked	locked	locked	locked	locked	locked	locked	locked	locked	locked	locked	locked	locked	locked	locked	locked	locked	locked	locked	locked	locked	locked	locked	locked
Burundi	kg	...	...	...	...	...	...	...	...	...	...	...	...	...	...	...	...	...	...	...	...	...	...	...	...	...	...	...	...	...	...	...	...	...	...	...	...	...	...	...	...	...	...	...	...	...	...	...	...
Cambodia	kg	locked	locked	locked	locked	locked	locked	locked	locked	locked	locked	locked	locked	locked	locked	locked	locked	locked	locked	locked	locked	locked	locked	locked	locked	locked	locked	locked	locked	locked	locked	locked	locked	locked	locked	locked	locked	locked	locked	locked	locked	locked	locked	locked	locked	locked	locked	locked	locked
Cameroon	kg	locked	locked	locked	locked	locked	locked	locked	locked	locked	locked	locked	locked	locked	locked	locked	locked	locked	locked	locked	locked	locked	locked	locked	locked	locked	locked	locked	locked	locked	locked	locked	locked	locked	locked	locked	locked	locked	locked	locked	locked	locked	locked	locked	locked	locked	locked	locked	locked
Canada	kg	locked	locked	locked	locked	locked	locked	locked	locked	locked	locked	locked	locked	locked	locked	locked	locked	locked	locked	locked	locked	locked	locked	locked	locked	locked	locked	locked	locked	locked	locked	locked	locked	locked	locked	locked	locked	locked	locked	locked	locked	locked	locked	locked	locked	locked	locked	locked	locked
Central African Republic	kg	locked	locked	locked	locked	locked	locked	locked	locked	locked	locked	locked	locked	locked	locked	locked	locked	locked	locked	locked	locked	locked	locked	locked	locked	locked	locked	locked	locked	locked	locked	locked	locked	locked	locked	locked	locked	locked	locked	locked	locked	locked	locked	locked	locked	locked	locked	locked	locked
Chad	kg	locked	locked	locked	locked	locked	locked	locked	locked	locked	locked	locked	locked	locked	locked	locked	locked	locked	locked	locked	locked	locked	locked	locked	locked	locked	locked	locked	locked	locked	locked	locked	locked	locked	locked	locked	locked	locked	locked	locked	locked	locked	locked	locked	locked	locked	locked	locked	locked
Chile	kg	locked	locked	locked	locked	locked	locked	locked	locked	locked	locked	locked	locked	locked	locked	locked	locked	locked	locked	locked	locked	locked	locked	locked	locked	locked	locked	locked	locked	locked	locked	locked	locked	locked	locked	locked	locked	locked	locked	locked	locked	locked	locked	locked	locked	locked	locked	locked	locked
China	kg	locked	locked	locked	locked	locked	locked	locked	locked	locked	locked	locked	locked	locked	locked	locked	locked	locked	locked	locked	locked	locked	locked	locked	locked	locked	locked	locked	locked	locked	locked	locked	locked	locked	locked	locked	locked	locked	locked	locked	locked	locked	locked	locked	locked	locked	locked	locked	locked
Colombia	kg	locked	locked	locked	locked	locked	locked	locked	locked	locked	locked	locked	locked	locked	locked	locked	locked	locked	locked	locked	locked	locked	locked	locked	locked	locked	locked	locked	locked	locked	locked	locked	locked	locked	locked	locked	locked	locked	locked	locked	locked	locked	locked	locked	locked	locked	locked	locked	locked
Comoros	kg	...	...	...	...	...	...	...	...	...	...	...	...	...	...	...	...	...	...	...	...	...	...	...	...	...	...	...	...	...	...	...	...	...	...	...	...	...	...	...	...	...	...	...	...	...	...	...	...
Congo	kg	locked	locked	locked	locked	locked	locked	locked	locked	locked	locked	locked	locked	locked	locked	locked	locked	locked	locked	locked	locked	locked	locked	locked	locked	locked	locked	locked	locked	locked	locked	locked	locked	locked	locked	locked	locked	locked	locked	locked	locked	locked	locked	locked	locked	locked	locked	locked	locked
Costa Rica	kg	locked	locked	locked	locked	locked	locked	locked	locked	locked	locked	locked	locked	locked	locked	locked	locked	locked	locked	locked	locked	locked	locked	locked	locked	locked	locked	locked	locked	locked	locked	locked	locked	locked	locked	locked	locked	locked	locked	locked	locked	locked	locked	locked	locked	locked	locked	locked	locked
Croatia	kg	...	...	...	...	...	...	...	...	...	...	...	...	...	...	...	...	...	...	...	...	...	...	...	...	...	...	...	...	...	...	...	locked	locked	locked	locked	locked	locked	locked	locked	locked	locked	locked	locked	locked	locked	locked	locked	locked
Cuba	kg	locked	locked	locked	locked	locked	locked	locked	locked	locked	locked	locked	locked	locked	locked	locked	locked	locked	locked	locked	locked	locked	locked	locked	locked	locked	locked	locked	locked	locked	locked	locked	locked	locked	locked	locked	locked	locked	locked	locked	locked	locked	locked	locked	locked	locked	locked	locked	locked
Cyprus	kg	locked	locked	locked	locked	locked	locked	locked	locked	locked	locked	locked	locked	locked	locked	locked	locked	locked	locked	locked	locked	locked	locked	locked	locked	locked	locked	locked	locked	locked	locked	locked	locked	locked	locked	locked	locked	locked	locked	locked	locked	locked	locked	locked	locked	locked	locked	locked	locked
Czechia	kg	locked	locked	locked	locked	locked	locked	locked	locked	locked	locked	locked	locked	locked	locked	locked	locked	locked	locked	locked	locked	locked	locked	locked	locked	locked	locked	locked	locked	locked	locked	locked	locked	locked	locked	locked	locked	locked	locked	locked	locked	locked	locked	locked	locked	locked	locked	locked	locked
Dem. People's Republic of Korea	kg	locked	locked	locked	locked	locked	locked	locked	locked	locked	locked	locked	locked	locked	locked	locked	locked	locked	locked	locked	locked	locked	locked	locked	locked	locked	locked	locked	locked	locked	locked	locked	locked	locked	locked	locked	locked	locked	locked	locked	locked	locked	locked	locked	locked	locked	locked	locked	locked
Denmark	kg	locked	locked	locked	locked	locked	locked	locked	locked	locked	locked	locked	locked	locked	locked	locked	locked	locked	locked	locked	locked	locked	locked	locked	locked	locked	locked	locked	locked	locked	locked	locked	locked	locked	locked	locked	locked	locked	locked	locked	locked	locked	locked	locked	locked	locked	locked	locked	locked
Djibouti	kg	...	...	...	...	...	...	...	...	...	...	...	...	...	...	...	...	...	...	locked	locked	locked	locked	locked	locked	locked	locked	locked	locked	locked	locked	locked	locked	locked	locked	locked	locked	locked	locked	locked	locked	locked	locked	locked	locked	locked	locked	locked	locked
Dominican Republic	kg	locked	locked	locked	locked	locked	locked	locked	locked	locked	locked	locked	locked	locked	locked	locked	locked	locked	locked	locked	locked	locked	locked	locked	locked	locked	locked	locked	locked	locked	locked	locked	locked	locked	locked	locked	locked	locked	locked	locked	locked	locked	locked	locked	locked	locked	locked	locked	locked
East Timor	kg	locked	locked	locked	locked	locked	locked	locked	locked	locked	locked	locked	locked	locked	locked	locked	locked	locked	locked	locked	locked	locked	locked	locked	locked	locked	locked	locked	locked	locked	locked	locked	locked	locked	locked	locked	locked	locked	locked	locked	locked	locked	locked	locked	locked	locked	locked	locked	locked
Ecuador	kg	locked	locked	locked	locked	locked	locked	locked	locked	locked	locked	locked	locked	locked	locked	locked	locked	locked	locked	locked	locked	locked	locked	locked	locked	locked	locked	locked	locked	locked	locked	locked	locked	locked	locked	locked	locked	locked	locked	locked	locked	locked	locked	locked	locked	locked	locked	locked	locked
Egypt	kg	locked	locked	locked	locked	locked	locked	locked	locked	locked	locked	locked	locked	locked	locked	locked	locked	locked	locked	locked	locked	locked	locked	locked	locked	locked	locked	locked	locked	locked	locked	locked	locked	locked	locked	locked	locked	locked	locked	locked	locked	locked	locked	locked	locked	locked	locked	locked	locked
El Salvador	kg	locked	locked	locked	locked	locked	locked	locked	locked	locked	locked	locked	locked	locked	locked	locked	locked	locked	locked	locked	locked	locked	locked	locked	locked	locked	locked	locked	locked	locked	locked	locked	locked	locked	locked	locked	locked	locked	locked	locked	locked	locked	locked	locked	locked	locked	locked	locked	locked
Estonia	kg	...	...	...	...	...	...	...	...	...	...	...	...	...	...	...	...	...	...	...	...	...	...	...	...	...	...	...	...	...	...	...	locked	locked	locked	locked	locked	locked	locked	locked	locked	locked	locked	locked	locked	locked	locked	locked	locked
Ethiopia	kg	locked	locked	locked	locked	locked	locked	locked	locked	locked	locked	locked	locked	locked	locked	locked	locked	locked	locked	locked	locked	locked	locked	locked	locked	locked	locked	locked	locked	locked	locked	locked	locked	locked	locked	locked	locked	locked	locked	locked	locked	locked	locked	locked	locked	locked	locked	locked	locked
European Union	kg	locked	locked	locked	locked	locked	locked	locked	locked	locked	locked	locked	locked	locked	locked	locked	locked	locked	locked	locked	locked	locked	locked	locked	locked	locked	locked	locked	locked	locked	locked	locked	locked	locked	locked	locked	locked	locked	locked	locked	locked	locked	locked	locked	locked	locked	locked	locked	locked
Fiji	kg	locked	locked	locked	locked	locked	locked	locked	locked	locked	locked	locked	locked	locked	locked	locked	locked	locked	locked	locked	locked	locked	locked	locked	locked	locked	locked	locked	locked	locked	locked	locked	locked	locked	locked	locked	locked	locked	locked	locked	locked	locked	locked	locked	locked	locked	locked	locked	locked
Finland	kg	locked	locked	locked	locked	locked	locked	locked	locked	locked	locked	locked	locked	locked	locked	locked	locked	locked	locked	locked	locked	locked	locked	locked	locked	locked	locked	locked	locked	locked	locked	locked	locked	locked	locked	locked	locked	locked	locked	locked	locked	locked	locked	locked	locked	locked	locked	locked	locked
France	kg	locked	locked	locked	locked	locked	locked	locked	locked	locked	locked	locked	locked	locked	locked	locked	locked	locked	locked	locked	locked	locked	locked	locked	locked	locked	locked	locked	locked	locked	locked	locked	locked	locked	locked	locked	locked	locked	locked	locked	locked	locked	locked	locked	locked	locked	locked	locked	locked
Gabon	kg	locked	locked	locked	locked	locked	locked	locked	locked	locked	locked	locked	locked	locked	locked	locked	locked	locked	locked	locked	locked	locked	locked	locked	locked	locked	locked	locked	locked	locked	locked	locked	locked	locked	locked	locked	locked	locked	locked	locked	locked	locked	locked	locked	locked	locked	locked	locked	locked
Gambia	kg	locked	locked	locked	locked	locked	locked	locked	locked	locked	locked	locked	locked	locked	locked	locked	locked	locked	locked	locked	locked	locked	locked	locked	locked	locked	locked	locked	locked	locked	locked	locked	locked	locked	locked	locked	locked	locked	locked	locked	locked	locked	locked	locked	locked	locked	locked	locked	locked
Georgia	kg	...	...	...	...	...	...	...	...	...	...	...	...	...	...	...	...	...	...	...	...	...	...	...	...	...	...	...	...	...	...	...	locked	locked	locked	locked	locked	locked	locked	locked	locked	locked	locked	locked	locked	locked	locked	locked	locked
Germany	kg	locked	locked	locked	locked	locked	locked	locked	locked	locked	locked	locked	locked	locked	locked	locked	locked	locked	locked	locked	locked	locked	locked	locked	locked	locked	locked	locked	locked	locked	locked	locked	locked	locked	locked	locked	locked	locked	locked	locked	locked	locked	locked	locked	locked	locked	locked	locked	locked
Ghana	kg	locked	locked	locked	locked	locked	locked	locked	locked	locked	locked	locked	locked	locked	locked	locked	locked	locked	locked	locked	locked	locked	locked	locked	locked	locked	locked	locked	locked	locked	locked	locked	locked	locked	locked	locked	locked	locked	locked	locked	locked	locked	locked	locked	locked	locked	locked	locked	locked
Greece	kg	locked	locked	locked	locked	locked	locked	locked	locked	locked	locked	locked	locked	locked	locked	locked	locked	locked	locked	locked	locked	locked	locked	locked	locked	locked	locked	locked	locked	locked	locked	locked	locked	locked	locked	locked	locked	locked	locked	locked	locked	locked	locked	locked	locked	locked	locked	locked	locked
Guatemala	kg	locked	locked	locked	locked	locked	locked	locked	locked	locked	locked	locked	locked	locked	locked	locked	locked	locked	locked	locked	locked	locked	locked	locked	locked	locked	locked	locked	locked	locked	locked	locked	locked	locked	locked	locked	locked	locked	locked	locked	locked	locked	locked	locked	locked	locked	locked	locked	locked
Guinea	kg	locked	locked	locked	locked	locked	locked	locked	locked	locked	locked	locked	locked	locked	locked	locked	locked	locked	locked	locked	locked	locked	locked	locked	locked	locked	locked	locked	locked	locked	locked	locked	locked	locked	locked	locked	locked	locked	locked	locked	locked	locked	locked	locked	locked	locked	locked	locked	locked
Guinea Bissau	kg	locked	locked	locked	locked	locked	locked	locked	locked	locked	locked	locked	locked	locked	locked	locked	locked	locked	locked	locked	locked	locked	locked	locked	locked	locked	locked	locked	locked	locked	locked	locked	locked	locked	locked	locked	locked	locked	locked	locked	locked	locked	locked	locked	locked	locked	locked	locked	locked
Guyana	kg	locked	locked	locked	locked	locked	locked	locked	locked	locked	locked	locked	locked	locked	locked	locked	locked	locked	locked	locked	locked	locked	locked	locked	locked	locked	locked	locked	locked	locked	locked	locked	locked	locked	locked	locked	locked	locked	locked	locked	locked	locked	locked	locked	locked	locked	locked	locked	locked
Haiti	kg	locked	locked	locked	locked	locked	locked	locked	locked	locked	locked	locked	locked	locked	locked	locked	locked	locked	locked	locked	locked	locked	locked	locked	locked	locked	locked	locked	locked	locked	locked	locked	locked	locked	locked	locked	locked	locked	locked	locked	locked	locked	locked	locked	locked	locked	locked	locked	locked
Honduras	kg	locked	locked	locked	locked	locked	locked	locked	locked	locked	locked	locked	locked	locked	locked	locked	locked	locked	locked	locked	locked	locked	locked	locked	locked	locked	locked	locked	locked	locked	locked	locked	locked	locked	locked	locked	locked	locked	locked	locked	locked	locked	locked	locked	locked	locked	locked	locked	locked
Hong Kong	kg	locked	locked	locked	locked	locked	locked	locked	locked	locked	locked	locked	locked	locked	locked	locked	locked	locked	locked	locked	locked	locked	locked	locked	locked	locked	locked	locked	locked	locked	locked	locked	locked	locked	locked	locked	locked	locked	locked	locked	locked	locked	locked	locked	locked	locked	locked	locked	locked
Hungary	kg	locked	locked	locked	locked	locked	locked	locked	locked	locked	locked	locked	locked	locked	locked	locked	locked	locked	locked	locked	locked	locked	locked	locked	locked	locked	locked	locked	locked	locked	locked	locked	locked	locked	locked	locked	locked	locked	locked	locked	locked	locked	locked	locked	locked	locked	locked	locked	locked
Iceland	kg	locked	locked	locked	locked	locked	locked	locked	locked	locked	locked	locked	locked	locked	locked	locked	locked	locked	locked	locked	locked	locked	locked	locked	locked	locked	locked	locked	locked	locked	locked	locked	locked	locked	locked	locked	locked	locked	locked	locked	locked	locked	locked	locked	locked	locked	locked	locked	locked
India	kg	locked	locked	locked	locked	locked	locked	locked	locked	locked	locked	locked	locked	locked	locked	locked	locked	locked	locked	locked	locked	locked	locked	locked	locked	locked	locked	locked	locked	locked	locked	locked	locked	locked	locked	locked	locked	locked	locked	locked	locked	locked	locked	locked	locked	locked	locked	locked	locked
Indonesia	kg	locked	locked	locked	locked	locked	locked	locked	locked	locked	locked	locked	locked	locked	locked	locked	locked	locked	locked	locked	locked	locked	locked	locked	locked	locked	locked	locked	locked	locked	locked	locked	locked	locked	locked	locked	locked	locked	locked	locked	locked	locked	locked	locked	locked	locked	locked	locked	locked
Iraq	kg	locked	...	...	...	...	...	...	...	...	...	...	...	...	...	...	...	...	...	...	...	...	...	...	...	...	...	...	...	...	...	...	...	...	...	...	...	...	...	...	...	...	...	locked	locked	...	...	...	...
Iran	kg	locked	locked	locked	locked	locked	locked	locked	locked	locked	locked	locked	locked	locked	locked	locked	locked	locked	locked	locked	...	...	...	...	...	...	...	...	...	...	...	...	...	...	...	...	...	...	...	...	...	...	...	...	...	...	...	...	...
Ireland	kg	locked	locked	locked	locked	locked	locked	locked	locked	locked	locked	locked	locked	locked	locked	locked	locked	locked	locked	locked	locked	locked	locked	locked	locked	locked	locked	locked	locked	locked	locked	locked	locked	locked	locked	locked	locked	locked	locked	locked	locked	locked	locked	locked	locked	locked	locked	locked	locked
Israel	kg	locked	locked	locked	locked	locked	locked	locked	locked	locked	locked	locked	locked	locked	locked	locked	locked	locked	locked	locked	locked	locked	locked	locked	locked	locked	locked	locked	locked	locked	locked	locked	locked	locked	locked	locked	locked	locked	locked	locked	locked	locked	locked	locked	locked	locked	locked	locked	locked
Italy	kg	locked	locked	locked	locked	locked	locked	locked	locked	locked	locked	locked	locked	locked	locked	locked	locked	locked	locked	locked	locked	locked	locked	locked	locked	locked	locked	locked	locked	locked	locked	locked	locked	locked	locked	locked	locked	locked	locked	locked	locked	locked	locked	locked	locked	locked	locked	locked	locked
Ivory Coast	kg	locked	locked	locked	locked	locked	locked	locked	locked	locked	locked	locked	locked	locked	locked	locked	locked	locked	locked	locked	locked	locked	locked	locked	locked	locked	locked	locked	locked	locked	locked	locked	locked	locked	locked	locked	locked	locked	locked	locked	locked	locked	locked	locked	locked	locked	locked	locked	locked
Jamaica	kg	locked	locked	locked	locked	locked	locked	locked	locked	locked	locked	locked	locked	locked	locked	locked	locked	locked	locked	locked	locked	locked	locked	locked	locked	locked	locked	locked	locked	locked	locked	locked	locked	locked	locked	locked	locked	locked	locked	locked	locked	locked	locked	locked	locked	locked	locked	locked	locked
Japan	kg	locked	locked	locked	locked	locked	locked	locked	locked	locked	locked	locked	locked	locked	locked	locked	locked	locked	locked	locked	locked	locked	locked	locked	locked	locked	locked	locked	locked	locked	locked	locked	locked	locked	locked	locked	locked	locked	locked	locked	locked	locked	locked	locked	locked	locked	locked	locked	locked
Jordan	kg	...	...	...	...	...	...	...	...	...	...	...	...	...	locked	...	...	locked	locked	locked	locked	locked	locked	locked	locked	locked	locked	locked	...	locked	...	...	...	...	locked	locked	...	locked	...	locked	locked	locked	locked	locked	locked	locked	locked	locked	locked
Kazakhstan	kg	...	...	...	...	...	...	...	...	...	...	...	...	...	...	...	...	...	...	...	...	...	...	...	...	...	...	...	...	...	...	...	locked	locked	locked	locked	locked	locked	locked	locked	locked	locked	locked	locked	locked	locked	locked	locked	locked
Kenya	kg	locked	locked	locked	locked	locked	locked	locked	locked	locked	locked	locked	locked	locked	locked	locked	locked	locked	locked	locked	locked	locked	locked	locked	locked	locked	locked	locked	locked	locked	locked	locked	locked	locked	locked	locked	locked	locked	locked	locked	locked	locked	locked	locked	locked	locked	locked	locked	locked
Kuwait	kg	...	...	...	...	...	...	...	...	...	...	...	...	...	...	...	...	...	...	...	...	...	...	...	...	...	...	...	...	...	...	...	...	...	...	...	...	...	...	...	...	...	...	...	...	...	...	...	...
Kyrgyzstan	kg	...	...	...	...	...	...	...	...	...	...	...	...	...	...	...	...	...	...	...	...	...	...	...	...	...	...	...	...	...	...	...	locked	locked	locked	locked	locked	locked	locked	locked	locked	locked	locked	locked	locked	locked	locked	locked	locked
Laos	kg	locked	locked	locked	locked	locked	locked	locked	locked	locked	locked	locked	locked	locked	locked	locked	locked	locked	locked	locked	locked	locked	locked	locked	locked	locked	locked	locked	locked	locked	locked	locked	locked	locked	locked	locked	locked	locked	locked	locked	locked	locked	locked	locked	locked	locked	locked	locked	locked
Latvia	kg	...	...	...	...	...	...	...	...	...	...	...	...	...	...	...	...	...	...	...	...	...	...	...	...	...	...	...	...	...	...	...	locked	locked	locked	locked	locked	locked	locked	locked	locked	locked	locked	locked	locked	locked	locked	locked	locked
Lebanon	kg	locked	locked	locked	locked	locked	locked	locked	locked	locked	locked	locked	locked	locked	locked	locked	locked	locked	locked	locked	locked	locked	locked	locked	locked	locked	locked	locked	locked	locked	locked	locked	locked	locked	locked	locked	locked	locked	locked	locked	locked	locked	locked	locked	locked	locked	locked	locked	locked
Lesotho	kg	locked	locked	locked	locked	locked	locked	locked	locked	locked	locked	locked	locked	locked	locked	locked	locked	locked	locked	locked	locked	locked	locked	locked	locked	locked	locked	locked	locked	locked	locked	locked	locked	locked	locked	locked	locked	locked	locked	locked	locked	locked	locked	locked	locked	locked	locked	locked	locked
Liberia	kg	locked	locked	locked	locked	locked	locked	locked	locked	locked	locked	locked	locked	locked	locked	locked	locked	locked	locked	locked	locked	locked	locked	locked	locked	locked	locked	locked	locked	locked	locked	locked	locked	locked	locked	locked	locked	locked	locked	locked	locked	locked	locked	locked	locked	locked	locked	locked	locked
Libya	kg	...	...	...	...	...	...	...	...	...	...	...	...	...	...	...	...	...	...	...	...	...	...	...	...	...	...	...	...	...	...	...	...	...	...	...	...	...	...	...	...	...	...	...	...	...	...	...	...
Lithuania	kg	...	...	...	...	...	...	...	...	...	...	...	...	...	...	...	...	...	...	...	...	...	...	...	...	...	...	...	...	...	...	...	locked	locked	locked	locked	locked	locked	locked	locked	locked	locked	locked	locked	locked	locked	locked	locked	locked
Luxembourg	kg	...	...	...	...	...	...	...	...	...	...	...	...	...	...	...	...	...	...	...	...	...	...	...	...	...	...	...	...	...	...	...	...	...	...	...	...	...	...	...	locked	locked	locked	locked	locked	locked	locked	locked	locked
Macao	kg	locked	locked	locked	locked	locked	locked	locked	locked	locked	locked	locked	locked	locked	locked	locked	locked	locked	locked	locked	locked	locked	locked	locked	locked	locked	locked	locked	locked	locked	locked	locked	locked	locked	locked	locked	locked	locked	locked	locked	locked	locked	locked	locked	locked	locked	locked	locked	locked
Macedonia	kg	...	...	...	...	...	...	...	...	...	...	...	...	...	...	...	...	...	...	...	...	...	...	...	...	...	...	...	...	...	...	...	locked	locked	locked	locked	locked	locked	locked	locked	locked	locked	locked	locked	locked	locked	locked	locked	locked
Madagascar	kg	locked	locked	locked	locked	locked	locked	locked	locked	locked	locked	locked	locked	locked	locked	locked	locked	locked	locked	locked	locked	locked	locked	locked	locked	locked	locked	locked	locked	locked	locked	locked	locked	locked	locked	locked	locked	locked	locked	locked	locked	locked	locked	locked	locked	locked	locked	locked	locked
Malawi	kg	locked	locked	locked	locked	locked	locked	locked	locked	locked	locked	locked	locked	locked	locked	locked	locked	locked	locked	locked	locked	locked	locked	locked	locked	locked	locked	locked	locked	locked	locked	locked	locked	locked	locked	locked	locked	locked	locked	locked	locked	locked	locked	locked	locked	locked	locked	locked	locked
Malaysia	kg	locked	locked	locked	locked	locked	locked	locked	locked	locked	locked	locked	locked	locked	locked	locked	locked	locked	locked	locked	locked	locked	locked	locked	locked	locked	locked	locked	locked	locked	locked	locked	locked	locked	locked	locked	locked	locked	locked	locked	locked	locked	locked	locked	locked	locked	locked	locked	locked
Maldives	kg	...	...	...	...	...	...	...	...	...	...	...	...	...	...	...	...	...	...	...	...	...	...	...	...	...	...	...	...	locked	locked	locked	locked	locked	locked	locked	locked	locked	locked	locked	locked	locked	locked	locked	locked	locked	locked	locked	locked
Mali	kg	locked	locked	locked	locked	locked	locked	locked	locked	locked	locked	locked	locked	locked	locked	locked	locked	locked	locked	locked	locked	locked	locked	locked	locked	locked	locked	locked	locked	locked	locked	locked	locked	locked	locked	locked	locked	locked	locked	locked	locked	locked	locked	locked	locked	locked	locked	locked	locked
Malta	kg	locked	locked	locked	locked	locked	locked	locked	locked	locked	locked	locked	locked	locked	locked	locked	locked	locked	locked	locked	locked	locked	locked	locked	locked	locked	locked	locked	locked	locked	locked	locked	locked	locked	locked	locked	locked	locked	locked	locked	locked	locked	locked	locked	locked	locked	locked	locked	locked
Mauritania	kg	...	...	...	...	...	...	...	...	...	...	...	...	...	...	locked	locked	locked	...	...	...	...	locked	...	locked	...	...	...	...	...	...	...	...	locked	...	...	...	...	...	...	...	...	locked	...	...	...	locked	locked	locked
Mauritius	kg	locked	locked	locked	locked	locked	locked	locked	locked	locked	locked	locked	locked	locked	locked	locked	locked	locked	locked	locked	locked	locked	locked	locked	locked	locked	locked	locked	locked	locked	locked	locked	locked	locked	locked	locked	locked	locked	locked	locked	locked	locked	locked	locked	locked	locked	locked	locked	locked
Mexico	kg	locked	locked	locked	locked	locked	locked	locked	locked	locked	locked	locked	locked	locked	locked	locked	locked	locked	locked	locked	locked	locked	locked	locked	locked	locked	locked	locked	locked	locked	locked	locked	locked	locked	locked	locked	locked	locked	locked	locked	locked	locked	locked	locked	locked	locked	locked	locked	locked
Moldova	kg	...	...	...	...	...	...	...	...	...	...	...	...	...	...	...	...	...	...	...	...	...	...	...	...	...	...	...	...	...	...	...	locked	locked	locked	locked	locked	locked	locked	locked	locked	locked	locked	locked	locked	locked	locked	locked	locked
Mongolia	kg	locked	locked	locked	locked	locked	locked	locked	locked	locked	locked	locked	locked	locked	locked	locked	locked	locked	locked	locked	locked	locked	locked	locked	locked	locked	locked	locked	locked	locked	locked	locked	locked	locked	locked	locked	locked	locked	locked	locked	locked	locked	locked	locked	locked	locked	locked	locked	locked
Montenegro	kg	...	...	...	...	...	...	...	...	...	...	...	...	...	...	...	...	...	...	...	...	...	...	...	...	...	...	...	...	...	...	...	...	...	...	...	...	...	...	...	...	...	...	...	...	...	locked	locked	locked
Morocco	kg	locked	locked	locked	locked	locked	locked	locked	locked	locked	locked	locked	locked	locked	locked	locked	locked	locked	locked	locked	locked	locked	locked	locked	locked	locked	locked	locked	locked	locked	locked	locked	locked	locked	locked	locked	locked	locked	locked	locked	locked	locked	locked	locked	locked	locked	locked	locked	locked
Mozambique	kg	locked	locked	locked	locked	locked	locked	locked	locked	locked	locked	locked	locked	locked	locked	locked	locked	locked	locked	locked	locked	locked	locked	locked	locked	locked	locked	locked	locked	locked	locked	locked	locked	locked	locked	locked	locked	locked	locked	locked	locked	locked	locked	locked	locked	locked	locked	locked	locked
Myanmar	kg	locked	locked	locked	locked	locked	locked	locked	locked	locked	locked	locked	locked	locked	locked	locked	locked	locked	locked	locked	locked	locked	locked	locked	locked	locked	locked	locked	locked	locked	locked	locked	locked	locked	locked	locked	locked	locked	locked	locked	locked	locked	locked	locked	locked	locked	locked	locked	locked
Namibia	kg	locked	locked	locked	locked	locked	locked	locked	locked	locked	locked	locked	locked	locked	locked	locked	locked	locked	locked	locked	locked	locked	locked	locked	locked	locked	locked	locked	locked	locked	locked	locked	locked	locked	locked	locked	locked	locked	locked	locked	locked	locked	locked	locked	locked	locked	locked	locked	locked
Nepal	kg	locked	locked	locked	locked	locked	locked	locked	locked	locked	locked	locked	locked	locked	locked	locked	locked	locked	locked	locked	locked	locked	locked	locked	locked	locked	locked	locked	locked	locked	locked	locked	locked	locked	locked	locked	locked	locked	locked	locked	locked	locked	locked	locked	locked	locked	locked	locked	locked
Netherlands	kg	locked	locked	locked	locked	locked	locked	locked	locked	locked	locked	locked	locked	locked	locked	locked	locked	locked	locked	locked	locked	locked	locked	locked	locked	locked	locked	locked	locked	locked	locked	locked	locked	locked	locked	locked	locked	locked	locked	locked	locked	locked	locked	locked	locked	locked	locked	locked	locked
New Zealand	kg	locked	locked	locked	locked	locked	locked	locked	locked	locked	locked	locked	locked	locked	locked	locked	locked	locked	locked	locked	locked	locked	locked	locked	locked	locked	locked	locked	locked	locked	locked	locked	locked	locked	locked	locked	locked	locked	locked	locked	locked	locked	locked	locked	locked	locked	locked	locked	locked
Nicaragua	kg	locked	locked	locked	locked	locked	locked	locked	locked	locked	locked	locked	locked	locked	locked	locked	locked	locked	locked	locked	locked	locked	locked	locked	locked	locked	locked	locked	locked	locked	locked	locked	locked	locked	locked	locked	locked	locked	locked	locked	locked	locked	locked	locked	locked	locked	locked	locked	locked
Niger	kg	locked	locked	locked	locked	locked	locked	locked	locked	locked	locked	locked	locked	locked	locked	locked	locked	locked	locked	locked	locked	locked	locked	locked	locked	locked	locked	locked	locked	locked	locked	locked	locked	locked	locked	locked	locked	locked	locked	locked	locked	locked	locked	locked	locked	locked	locked	locked	locked
Nigeria	kg	locked	locked	locked	locked	locked	locked	locked	locked	locked	locked	locked	locked	locked	locked	locked	locked	locked	locked	locked	locked	locked	locked	locked	locked	locked	locked	locked	locked	locked	locked	locked	locked	locked	locked	locked	locked	locked	locked	locked	locked	locked	locked	locked	locked	locked	locked	locked	locked
Norway	kg	locked	locked	locked	locked	locked	locked	locked	locked	locked	locked	locked	locked	locked	locked	locked	locked	locked	locked	locked	locked	locked	locked	locked	locked	locked	locked	locked	locked	locked	locked	locked	locked	locked	locked	locked	locked	locked	locked	locked	locked	locked	locked	locked	locked	locked	locked	locked	locked
Oman	kg	...	...	...	...	...	...	...	...	...	...	...	...	...	...	...	...	...	...	...	...	...	...	...	...	...	...	...	...	...	locked	locked	locked	locked	locked	locked	locked	locked	...	...	locked	locked	locked	locked	locked	locked	locked	...	locked
Panama	kg	locked	locked	locked	locked	locked	locked	locked	locked	locked	locked	locked	locked	locked	locked	locked	locked	locked	locked	locked	locked	locked	locked	locked	locked	locked	locked	locked	locked	locked	locked	locked	locked	locked	locked	locked	locked	locked	locked	locked	locked	locked	locked	locked	locked	locked	locked	locked	locked
Papua New Guinea	kg	...	...	...	...	...	...	...	...	...	...	...	...	...	...	...	...	...	...	...	...	...	...	...	...	...	...	...	...	...	...	...	...	...	...	...	...	...	...	...	...	...	...	...	...	...	...	...	...
Paraguay	kg	locked	locked	locked	locked	locked	locked	locked	locked	locked	locked	locked	locked	locked	locked	locked	locked	locked	locked	locked	locked	locked	locked	locked	locked	locked	locked	locked	locked	locked	locked	locked	locked	locked	locked	locked	locked	locked	locked	locked	locked	locked	locked	locked	locked	locked	locked	locked	locked
Peru	kg	locked	locked	locked	locked	locked	locked	locked	locked	locked	locked	locked	locked	locked	locked	locked	locked	locked	locked	locked	locked	locked	locked	locked	locked	locked	locked	locked	locked	locked	locked	locked	locked	locked	locked	locked	locked	locked	locked	locked	locked	locked	locked	locked	locked	locked	locked	locked	locked
Philippines	kg	locked	locked	locked	locked	locked	locked	locked	locked	locked	locked	locked	locked	locked	locked	locked	locked	locked	locked	locked	locked	locked	locked	locked	locked	locked	locked	locked	locked	locked	locked	locked	locked	locked	locked	locked	locked	locked	locked	locked	locked	locked	locked	locked	locked	locked	locked	locked	locked
Poland	kg	locked	locked	locked	locked	locked	locked	locked	locked	locked	locked	locked	locked	locked	locked	locked	locked	locked	locked	locked	locked	locked	locked	locked	locked	locked	locked	locked	locked	locked	locked	locked	locked	locked	locked	locked	locked	locked	locked	locked	locked	locked	locked	locked	locked	locked	locked	locked	locked
Portugal	kg	locked	locked	locked	locked	locked	locked	locked	locked	locked	locked	locked	locked	locked	locked	locked	locked	locked	locked	locked	locked	locked	locked	locked	locked	locked	locked	locked	locked	locked	locked	locked	locked	locked	locked	locked	locked	locked	locked	locked	locked	locked	locked	locked	locked	locked	locked	locked	locked
Romania	kg	locked	locked	locked	locked	locked	locked	locked	locked	locked	locked	locked	locked	locked	locked	locked	locked	locked	locked	locked	locked	locked	locked	locked	locked	locked	locked	locked	locked	locked	locked	locked	locked	locked	locked	locked	locked	locked	locked	locked	locked	locked	locked	locked	locked	locked	locked	locked	locked
Russia	kg	...	...	...	...	...	...	...	...	...	...	...	...	...	...	...	...	...	...	...	...	...	...	...	...	...	...	...	...	...	...	...	locked	locked	locked	locked	locked	locked	locked	locked	locked	locked	locked	locked	locked	locked	locked	locked	locked
Rwanda	kg	locked	locked	locked	locked	locked	locked	locked	locked	locked	locked	locked	locked	locked	locked	locked	locked	locked	locked	locked	locked	locked	locked	locked	locked	locked	locked	locked	locked	locked	locked	locked	locked	locked	locked	locked	locked	locked	locked	locked	locked	locked	locked	locked	locked	locked	locked	locked	locked
Saudi Arabia	kg	...	...	...	...	...	...	...	...	...	...	...	...	...	...	...	...	...	...	...	...	...	...	...	...	...	...	...	...	...	...	...	...	...	...	...	...	...	...	...	...	...	...	...	...	...	...	...	...
Senegal	kg	locked	locked	locked	locked	locked	locked	locked	locked	locked	locked	locked	locked	locked	locked	locked	locked	locked	locked	locked	locked	locked	locked	locked	locked	locked	locked	locked	locked	locked	locked	locked	locked	locked	locked	locked	locked	locked	locked	locked	locked	locked	locked	locked	locked	locked	locked	locked	locked
Serbia	kg	...	...	...	...	...	...	...	...	...	...	...	...	...	...	...	...	...	...	...	...	...	...	...	...	...	...	...	...	...	...	...	...	...	...	...	...	...	...	...	...	...	...	...	...	...	locked	locked	locked
Seychelles	kg	...	...	...	...	...	...	...	...	...	...	...	...	...	...	...	...	...	...	...	...	...	...	...	...	...	...	...	...	...	...	...	...	...	...	...	...	...	...	...	...	...	...	...	...	...	...	...	...
Sierra Leone	kg	locked	locked	locked	locked	locked	locked	locked	locked	locked	locked	locked	locked	locked	locked	locked	locked	locked	locked	locked	locked	locked	locked	locked	locked	locked	locked	locked	locked	locked	locked	locked	locked	locked	locked	locked	locked	locked	locked	locked	locked	locked	locked	locked	locked	locked	locked	locked	locked
Slovakia	kg	locked	locked	locked	locked	locked	locked	locked	locked	locked	locked	locked	locked	locked	locked	locked	locked	locked	locked	locked	locked	locked	locked	locked	locked	locked	locked	locked	locked	locked	locked	locked	locked	locked	locked	locked	locked	locked	locked	locked	locked	locked	locked	locked	locked	locked	locked	locked	locked
Slovenia	kg	...	...	...	...	...	...	...	...	...	...	...	...	...	...	...	...	...	...	...	...	...	...	...	...	...	...	...	...	...	...	...	locked	locked	locked	locked	locked	locked	locked	locked	locked	locked	locked	locked	locked	locked	locked	locked	locked
South Africa	kg	locked	locked	locked	locked	locked	locked	locked	locked	locked	locked	locked	locked	locked	locked	locked	locked	locked	locked	locked	locked	locked	locked	locked	locked	locked	locked	locked	locked	locked	locked	locked	locked	locked	locked	locked	locked	locked	locked	locked	locked	locked	locked	locked	locked	locked	locked	locked	locked
South Korea	kg	locked	locked	locked	locked	locked	locked	locked	locked	locked	locked	locked	locked	locked	locked	locked	locked	locked	locked	locked	locked	locked	locked	locked	locked	locked	locked	locked	locked	locked	locked	locked	locked	locked	locked	locked	locked	locked	locked	locked	locked	locked	locked	locked	locked	locked	locked	locked	locked
Spain	kg	locked	locked	locked	locked	locked	locked	locked	locked	locked	locked	locked	locked	locked	locked	locked	locked	locked	locked	locked	locked	locked	locked	locked	locked	locked	locked	locked	locked	locked	locked	locked	locked	locked	locked	locked	locked	locked	locked	locked	locked	locked	locked	locked	locked	locked	locked	locked	locked
Sri Lanka	kg	locked	locked	locked	locked	locked	locked	locked	locked	locked	locked	locked	locked	locked	locked	locked	locked	locked	locked	locked	locked	locked	locked	locked	locked	locked	locked	locked	locked	locked	locked	locked	locked	locked	locked	locked	locked	locked	locked	locked	locked	locked	locked	locked	locked	locked	locked	locked	locked
Suriname	kg	locked	locked	locked	locked	locked	locked	locked	locked	locked	locked	locked	locked	locked	locked	locked	locked	locked	locked	locked	locked	locked	locked	locked	locked	locked	locked	locked	locked	locked	locked	locked	locked	locked	locked	locked	locked	locked	locked	locked	locked	locked	locked	locked	locked	locked	locked	locked	locked
Swaziland	kg	locked	locked	locked	locked	locked	locked	locked	locked	locked	locked	locked	locked	locked	locked	locked	locked	locked	locked	locked	locked	locked	locked	locked	locked	locked	locked	locked	locked	locked	locked	locked	locked	locked	locked	locked	locked	locked	locked	locked	locked	locked	locked	locked	locked	locked	locked	locked	locked
Sweden	kg	locked	locked	locked	locked	locked	locked	locked	locked	locked	locked	locked	locked	locked	locked	locked	locked	locked	locked	locked	locked	locked	locked	locked	locked	locked	locked	locked	locked	locked	locked	locked	locked	locked	locked	locked	locked	locked	locked	locked	locked	locked	locked	locked	locked	locked	locked	locked	locked
Switzerland	kg	locked	locked	locked	locked	locked	locked	locked	locked	locked	locked	locked	locked	locked	locked	locked	locked	locked	locked	locked	locked	locked	locked	locked	locked	locked	locked	locked	locked	locked	locked	locked	locked	locked	locked	locked	locked	locked	locked	locked	locked	locked	locked	locked	locked	locked	locked	locked	locked
Taiwan	kg	locked	locked	locked	locked	locked	locked	locked	locked	locked	locked	locked	locked	locked	locked	locked	locked	locked	locked	locked	locked	locked	locked	locked	locked	locked	locked	locked	locked	locked	locked	locked	locked	locked	locked	locked	locked	locked	locked	locked	locked	locked	locked	locked	locked	locked	locked	locked	locked
Tajikistan	kg	...	...	...	...	...	...	...	...	...	...	...	...	...	...	...	...	...	...	...	...	...	...	...	...	...	...	...	...	...	...	...	locked	locked	locked	locked	locked	locked	locked	locked	locked	locked	locked	locked	locked	locked	locked	locked	locked
Tanzania	kg	locked	locked	locked	locked	locked	locked	locked	locked	locked	locked	locked	locked	locked	locked	locked	locked	locked	locked	locked	locked	locked	locked	locked	locked	locked	locked	locked	locked	locked	locked	locked	locked	locked	locked	locked	locked	locked	locked	locked	locked	locked	locked	locked	locked	locked	locked	locked	locked
Thailand	kg	locked	locked	locked	locked	locked	locked	locked	locked	locked	locked	locked	locked	locked	locked	locked	locked	locked	locked	locked	locked	locked	locked	locked	locked	locked	locked	locked	locked	locked	locked	locked	locked	locked	locked	locked	locked	locked	locked	locked	locked	locked	locked	locked	locked	locked	locked	locked	locked
Togo	kg	locked	locked	locked	locked	locked	locked	locked	locked	locked	locked	locked	locked	locked	locked	locked	locked	locked	locked	locked	locked	locked	locked	locked	locked	locked	locked	locked	locked	locked	locked	locked	locked	locked	locked	locked	locked	locked	locked	locked	locked	locked	locked	locked	locked	locked	locked	locked	locked
Trinidad and Tobago	kg	locked	locked	locked	locked	locked	locked	locked	locked	locked	locked	locked	locked	locked	locked	locked	locked	locked	locked	locked	locked	locked	locked	locked	locked	locked	locked	locked	locked	locked	locked	locked	locked	locked	locked	locked	locked	locked	locked	locked	locked	locked	locked	locked	locked	locked	locked	locked	locked
Tunisia	kg	...	...	...	...	...	...	...	...	...	...	...	...	...	...	...	...	...	...	...	...	...	...	...	...	...	...	...	...	...	...	...	...	...	...	...	...	...	...	...	...	...	...	...	...	...	...	...	...
Turkey	kg	locked	locked	locked	locked	locked	locked	locked	locked	locked	locked	locked	locked	locked	locked	locked	locked	locked	...	...	locked	...	...	locked	locked	locked	locked	...	...	locked	locked	locked	locked	...	...	...	...	...	...	...	...	...	...	...	...	...	...	...	...
Turkmenistan	kg	...	...	...	...	...	...	...	...	...	...	...	...	...	...	...	...	...	...	...	...	...	...	...	...	...	...	...	...	...	...	...	locked	locked	locked	locked	locked	locked	locked	locked	locked	locked	locked	locked	locked	locked	locked	locked	locked
Uganda	kg	locked	locked	locked	locked	locked	locked	locked	locked	locked	locked	locked	locked	locked	locked	locked	locked	locked	locked	locked	locked	locked	locked	locked	locked	locked	locked	locked	locked	locked	locked	locked	locked	locked	locked	locked	locked	locked	locked	locked	locked	locked	locked	locked	locked	locked	locked	locked	locked
Ukraine	kg	...	...	...	...	...	...	...	...	...	...	...	...	...	...	...	...	...	...	...	...	...	...	...	...	...	...	...	...	...	...	...	locked	locked	locked	locked	locked	locked	locked	locked	locked	locked	locked	locked	locked	locked	locked	locked	locked
United Arab Emirates	kg	...	...	...	...	...	...	...	...	...	...	...	...	...	...	...	...	...	...	...	...	...	...	...	...	...	...	...	...	...	...	...	...	...	...	...	...	...	...	...	...	...	...	...	...	...	...	...	...
United Kingdom	kg	locked	locked	locked	locked	locked	locked	locked	locked	locked	locked	locked	locked	locked	locked	locked	locked	locked	locked	locked	locked	locked	locked	locked	locked	locked	locked	locked	locked	locked	locked	locked	locked	locked	locked	locked	locked	locked	locked	locked	locked	locked	locked	locked	locked	locked	locked	locked	locked
USA	kg	locked	locked	locked	locked	locked	locked	locked	locked	locked	locked	locked	locked	locked	locked	locked	locked	locked	locked	locked	locked	locked	locked	locked	locked	locked	locked	locked	locked	locked	locked	locked	locked	locked	locked	locked	locked	locked	locked	locked	locked	locked	locked	locked	locked	locked	locked	locked	locked
Uruguay	kg	locked	locked	locked	locked	locked	locked	locked	locked	locked	locked	locked	locked	locked	locked	locked	locked	locked	locked	locked	locked	locked	locked	locked	locked	locked	locked	locked	locked	locked	locked	locked	locked	locked	locked	locked	locked	locked	locked	locked	locked	locked	locked	locked	locked	locked	locked	locked	locked
Uzbekistan	kg	...	...	...	...	...	...	...	...	...	...	...	...	...	...	...	...	...	...	...	...	...	...	...	...	...	...	...	...	...	...	...	locked	locked	locked	locked	locked	locked	locked	locked	locked	locked	locked	locked	locked	locked	locked	locked	locked
Venezuela	kg	locked	locked	locked	locked	locked	locked	locked	locked	locked	locked	locked	locked	locked	locked	locked	locked	locked	locked	locked	locked	locked	locked	locked	locked	locked	locked	locked	locked	locked	locked	locked	locked	locked	locked	locked	locked	locked	locked	locked	locked	locked	locked	locked	locked	locked	locked	locked	locked
Vietnam	kg	locked	locked	locked	locked	locked	locked	locked	locked	locked	locked	locked	locked	locked	locked	locked	locked	locked	locked	locked	locked	locked	locked	locked	locked	locked	locked	locked	locked	locked	locked	locked	locked	locked	locked	locked	locked	locked	locked	locked	locked	locked	locked	locked	locked	locked	locked	locked	locked
Yemen	kg	locked	locked	locked	locked	locked	locked	locked	...	...	...	...	locked	locked	...	...	...	...	...	...	...	...	...	...	...	...	...	...	...	...	...	...	...	...	...	...	...	...	...	...	...	locked	...	...	...	locked	...	...	locked
Zambia	kg	locked	locked	locked	locked	locked	locked	locked	locked	locked	locked	locked	locked	locked	locked	locked	locked	locked	locked	locked	locked	locked	locked	locked	locked	locked	locked	locked	locked	locked	locked	locked	locked	locked	locked	locked	locked	locked	locked	locked	locked	locked	locked	locked	locked	locked	locked	locked	locked
Zimbabwe	kg	locked	locked	locked	locked	locked	locked	locked	locked	locked	locked	locked	locked	locked	locked	locked	locked	locked	locked	locked	locked	locked	locked	locked	locked	locked	locked	locked	locked	locked	locked	locked	locked	locked	locked	locked	locked	locked	locked	locked	locked	locked	locked	locked	locked	locked	locked	locked	locked
Dem. Republic of the Congo	kg	...	...	...	...	...	...	...	...	...	...	...	...	...	...	...	...	...	...	...	...	...	...	...	...	...	...	...	...	...	...	...	...	...	...	...	...	...	...	...	...	...	...	...	...	...	...	...	...
[truncated: 13 more columns]
